# Supplementary material for: Protein Interaction Networks by Proteome Peptide Scanning
Source: PLoS Biol. 2004 Jan 20;2(1):e14. doi: 10.1371/journal.pbio.0020014 (PMC314469; doi:10.1371/journal.pbio.0020014)
Supplement: Table S1 — (66 KB PDF). [file pbio.0020014.st001.pdf]

**Table 1. Design of relaxed consensi .**

|         | Phage display Consensus | Relaxed consensus                                                             | N of peptides screened |
|---------|-------------------------|-------------------------------------------------------------------------------|------------------------|
| Rvs167  | RxFPxxPP<br>PP□ PPR     | (R/K) xxPxxP<br>PxxPx (R/K)                                                   | 735<br>729             |
| Yfr024c | PxLPxRP                 | (R/K) xxPxxP<br>PxxPx (R/K)                                                   | 735<br>729             |
| Ysc84   | PxLPxR                  | (R/K) xxPxxP<br>PxxPx (R/K)                                                   | 735<br>729             |
| Boi1    | RxxPxxP<br>pPRxPrR□     | (R/K) xxPxxP<br>PxxPx (R/K)                                                   | 735<br>729             |
| Boi2    | ppRnPxR□                | (R/K) xxPxxP<br>PxxPx (R/K)                                                   | 735<br>729             |
| Abp1    | +P□ xxPx+P<br>PxxPxRP   | xxPx (K/R) P<br>Pxxx (K/R) P                                                  | 687<br>714             |
| Myo5    | Px@pPPxxP               | (R/K) xxPxxP<br>(F/P/L/W/A/E) xx (W/Y/L/M/F/H) x<br>xPxxP                     | 735<br>470             |
| Amph1   | PxRPxR                  | (P/F/L/I) (K/R) RP<br>(P/F/L/I) xRPx (R/K)<br>(P/L/R/F/S/I/V/K/G) Px (R/K) PP | 1684<br>1139<br>951    |
| End1    | P+RPPxP                 | (P/F/L/I) (K/R) RP<br>(P/F/L/I) xRPx (R/K)<br>(P/L/R/F/S/I/V/K/G) Px (R/K) PP | 1684<br>1139<br>951    |

@: aromatic residues; □ : hydrophobic residues; + : arginine or lysine; x: any residue.

The phage display *consensus* sequences were obtained by Tong et al (2002) and by Cestra et al (2001).
